# Supplementary material for: Association with the origin recognition complex suggests a novel role for histone acetyltransferase Hat1p/Hat2p
Source: PubMed Central journal article supplement (PMC2140264; doi:10.1186/1741-7007-5-38), 2007-09-19

**A**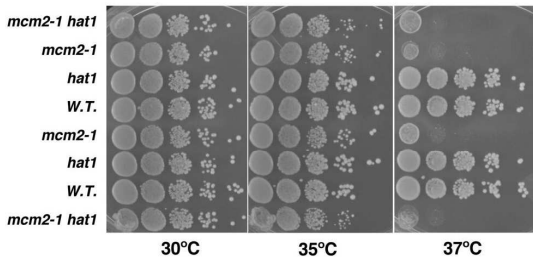**B**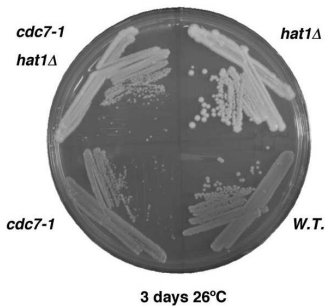

Supplement: 1741-7007-5-38-S2.pdf [file 1741-7007-5-38-S2.pdf]
